# Supplementary material
Source: Springer Nature journal article supplement (https://www.springermedizin.de/resource/supplementary/12957_2013_1408_MOESM8_ESM.pdf/9562532)
Supplement: MOESM8 [file 9562532]

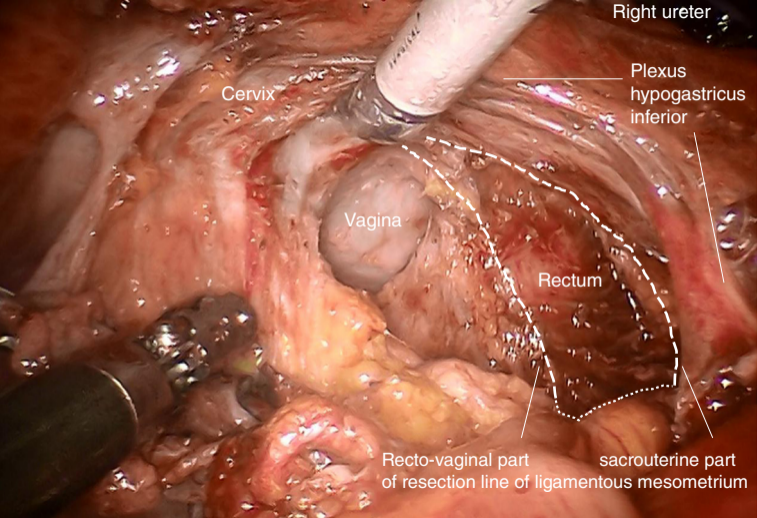

Right ureter

Plexus hypogastricus inferior

Cervix

Vagina

Rectum

Recto-vaginal part of resection line of ligamentous mesometrium

sacrouterine part of resection line of ligamentous mesometrium
